# Supplementary material for: Unraveling the thermodynamic criteria for size-dependent spontaneous phase separation in soft porous crystals
Source: PubMed Central journal article supplement (PMC6813293; doi:10.1038/s41467-019-12754-w), 2019-10-24
Supplement: 41467_2019_12754_MOESM3_ESM.pdf [file 41467_2019_12754_MOESM3_ESM.pdf]

## Description of Additional Supplementary Files

**File name:** Supplementary Movie 1

**Description:** 5 ps ( $N, P, \sigma_a = \mathbf{0}, T$ ) molecular dynamics simulation at 40 MPa and 300 K for a 1×2×1 nanocell of MIL-53(Al). The subcells are color coded according to the volume. The closed-pore phase ( $V < 900 \text{ \AA}^3$ ), unstable region ( $900 \text{ \AA}^3 \leq V < 1400 \text{ \AA}^3$ ), and large-pore phase ( $V \geq 1400 \text{ \AA}^3$ ) are indicated by circles, crosses, and squares, respectively.

**File name:** Supplementary Movie 2

**Description:** 5 ps ( $N, P, \sigma_a = \mathbf{0}, T$ ) molecular dynamics simulation at 40 MPa and 300 K for a 2×2×2 nanocell of MIL-53(Al). The subcells are color coded according to the volume. The closed-pore phase ( $V < 900 \text{ \AA}^3$ ), unstable region ( $900 \text{ \AA}^3 \leq V < 1400 \text{ \AA}^3$ ), and large-pore phase ( $V \geq 1400 \text{ \AA}^3$ ) are indicated by circles, crosses, and squares, respectively.

**File name:** Supplementary Movie 3

**Description:** 5 ps ( $N, P, \sigma_a = \mathbf{0}, T$ ) molecular dynamics simulation at 40 MPa and 300 K for a 4×2×4 nanocell of MIL-53(Al). The subcells are color coded according to the volume. The closed-pore phase ( $V < 900 \text{ \AA}^3$ ), unstable region ( $900 \text{ \AA}^3 \leq V < 1400 \text{ \AA}^3$ ), and large-pore phase ( $V \geq 1400 \text{ \AA}^3$ ) are indicated by circles, crosses, and squares, respectively.

**File name:** Supplementary Movie 4

**Description:** 5 ps ( $N, P, \sigma_a = \mathbf{0}, T$ ) molecular dynamics simulation at 40 MPa and 300 K for a 6×2×6 nanocell of MIL-53(Al). The subcells are color coded according to the volume. The closed-pore phase ( $V < 900 \text{ \AA}^3$ ), unstable region ( $900 \text{ \AA}^3 \leq V < 1400 \text{ \AA}^3$ ), and large-pore phase ( $V \geq 1400 \text{ \AA}^3$ ) are indicated by circles, crosses, and squares, respectively.

**File name:** Supplementary Movie 5

**Description:** 5 ps ( $N, P, \sigma_a = \mathbf{0}, T$ ) molecular dynamics simulation at 40 MPa and 300 K for a 8×2×8 mesocell of MIL-53(Al). The subcells are color coded according to the volume. The closed-pore phase ( $V < 900 \text{ \AA}^3$ ), unstable region ( $900 \text{ \AA}^3 \leq V < 1400 \text{ \AA}^3$ ), and large-pore phase ( $V \geq 1400 \text{ \AA}^3$ ) are indicated by circles, crosses, and squares, respectively.

**File name:** Supplementary Movie 6

**Description:** 25 ps ( $N, P, \sigma_a = \mathbf{0}, T$ ) molecular dynamics simulation at 180 MPa and 300 K for a 8×2×8 mesocell of DMOF-1(Zn). The subcells are color coded according to the volume. The closed-pore phase ( $V < 1450 \text{ \AA}^3$ ), unstable region ( $1450 \text{ \AA}^3 \leq V < 2300 \text{ \AA}^3$ ), and large-pore phase ( $V \geq 2300 \text{ \AA}^3$ ) are indicated by circles, crosses, and squares, respectively.

**File name:** Supplementary Movie 7

**Description:** 5 ps ( $N, P, \sigma_a = \mathbf{0}, T$ ) molecular dynamics simulation at 80 MPa and 100 K for a  $8 \times 2 \times 8$  mesocell of MIL-53(Al)-F. The subcells are color coded according to the volume. The closed-pore phase ( $V < 1000 \text{ \AA}^3$ ), unstable region ( $1000 \text{ \AA}^3 \leq V < 1250 \text{ \AA}^3$ ), and large-pore phase ( $V \geq 1250 \text{ \AA}^3$ ) are indicated by circles, crosses, and squares, respectively.

**File name:** Supplementary Movie 8

**Description:** 5 ps ( $N, P, \sigma_a = \mathbf{0}, T$ ) molecular dynamics simulation at 60 MPa and 300 K for a  $8 \times 2 \times 8$  mesocell of MIL-53(Al)-F. The subcells are color coded according to the volume. The closed-pore phase ( $V < 1000 \text{ \AA}^3$ ), unstable region ( $1000 \text{ \AA}^3 \leq V < 1250 \text{ \AA}^3$ ), and large-pore phase ( $V \geq 1250 \text{ \AA}^3$ ) are indicated by circles, crosses, and squares, respectively.

**File name:** Supplementary Movie 9

**Description:** 5 ps ( $N, P, \sigma_a = \mathbf{0}, T$ ) molecular dynamics simulation at 60 MPa and 500 K for a  $8 \times 2 \times 8$  mesocell of MIL-53(Al)-F. The subcells are color coded according to the volume. The closed-pore phase ( $V < 1000 \text{ \AA}^3$ ), unstable region ( $1000 \text{ \AA}^3 \leq V < 1250 \text{ \AA}^3$ ), and large-pore phase ( $V \geq 1250 \text{ \AA}^3$ ) are indicated by circles, crosses, and squares, respectively.

**File name:** Supplementary Movie 10

**Description:** 15 ps ( $N, P, \sigma_a = \mathbf{0}, T$ ) molecular dynamics simulation at 80 MPa and 300 K for an empty  $8 \times 2 \times 8$  mesocell of CoBDP. The subcells are color coded according to the volume. The closed-pore phase ( $V < 1200 \text{ \AA}^3$ ), unstable region ( $1200 \text{ \AA}^3 \leq V < 2350 \text{ \AA}^3$ ), and large-pore phase ( $V \geq 2350 \text{ \AA}^3$ ) are indicated by circles, crosses, and squares, respectively.

**File name:** Supplementary Movie 11

**Description:** 30 ps ( $N, P, \sigma_a = \mathbf{0}, T$ ) molecular dynamics simulation at 80 MPa and 300 K for a  $8 \times 2 \times 8$  mesocell of CoBDP with two methane molecules per unit cell. The subcells are color coded according to the volume. The closed-pore phase ( $V < 1200 \text{ \AA}^3$ ), unstable region ( $1200 \text{ \AA}^3 \leq V < 2350 \text{ \AA}^3$ ), and large-pore phase ( $V \geq 2350 \text{ \AA}^3$ ) are indicated by circles, crosses, and squares, respectively.

**File name:** Supplementary Movie 12

**Description:** 15 ps ( $N, P, \sigma_a = \mathbf{0}, T$ ) molecular dynamics simulation at 80 MPa and 300 K for a  $8 \times 2 \times 8$  mesocell of CoBDP with four methane molecules per unit cell. The subcells are color coded according to the volume. The closed-pore phase ( $V < 1200 \text{ \AA}^3$ ), unstable region ( $1200 \text{ \AA}^3 \leq V < 2350 \text{ \AA}^3$ ), and large-pore phase ( $V \geq 2350 \text{ \AA}^3$ ) are indicated by circles, crosses, and squares, respectively.
